# Supplementary material
Source: publisher figshare collection journal article supplement (https://sage.figshare.com/ndownloader/files/15254726)
Supplement: Supplementary file 1 [file 15254726]

## APPENDIX 2. Details for Two Health-Care Lotteries Example

Consider the following hypothetical scenario:<sup>38</sup>

- Lottery A: {0.5, (pain-free, 10 years); 0.5, (pain, 1 year)}
- An unwitting analyst who uses the additive MCDA model, Eq. (5), to calculate the lottery payoffs:

$$U_{add}(\text{pain-free}, 10 \text{ years}) = k u_H(\text{pain-free}) + (1.0 - k) u_T(10 \text{ years})$$

$$U_{add}(\text{pain}, 1 \text{ year}) = k u_H(\text{pain}) + (1 - k) u_T(1 \text{ year}).$$

In accordance with vNM EUT,

$$EU(\text{Lottery A})$$

$$= 0.5 \times k \times (u_H(\text{pain-free}) + u_H(\text{pain})) + 0.5 \times (1.0 - k) \times (u_T(10 \text{ years}) + u_T(1 \text{ year})).$$

A similar calculation for Lottery B yields  $EU(\text{Lottery B}) = EU(\text{Lottery A})$ .
